# Supplementary material
Source: Springer Nature journal article supplement (https://www.springermedizin.de/resource/supplementary/12873_2008_77_MOESM1_ESM.pdf/9431968)
Supplement: MOESM1 [file 9431968]

```
graph TD; A([Limitations in laypeople knowledge  
Cultural aspects  
Insufficient telecommunications  
Suboptimal pre-hospital services]) --> B[Laypeople overcrowding  
Emotional behaviour  
Interference in the work of EMS]; B --> C[Traffic jams  
Late arrival of the emergency services  
Secondary crashes and injuries]; C --> D([Increased morbidity  
and mortality]);
```

Limitations in laypeople knowledge  
Cultural aspects  
Insufficient telecommunications  
Suboptimal pre-hospital services

Laypeople overcrowding  
Emotional behaviour  
Interference in the work of EMS

Traffic jams  
Late arrival of the emergency services  
Secondary crashes and injuries

Increased morbidity  
and mortality
